# Supplementary material for: Investigation of the crystal structure and electrochemical performance of Gd doped LaNb0.9Mo0.1O4.05
Source: Royal Society of Chemistry journal article supplement (doi:10.1039/d3ma00268c), 2023-01-01
Supplement: d3ma00268c1.pdf [file d3ma00268c1.pdf]

# Supporting Information for

## Investigation of crystal structure and electrochemical performance of Gd doped $\text{LaNb}_{0.9}\text{Mo}_{0.1}\text{O}_{4.05}$

Yidong Han, Stephen Skinner\*

Department of Materials

Imperial College London, Exhibition Road, London, SW7 2AZ, United Kingdom

\* S.skinner@imperial.ac.uk

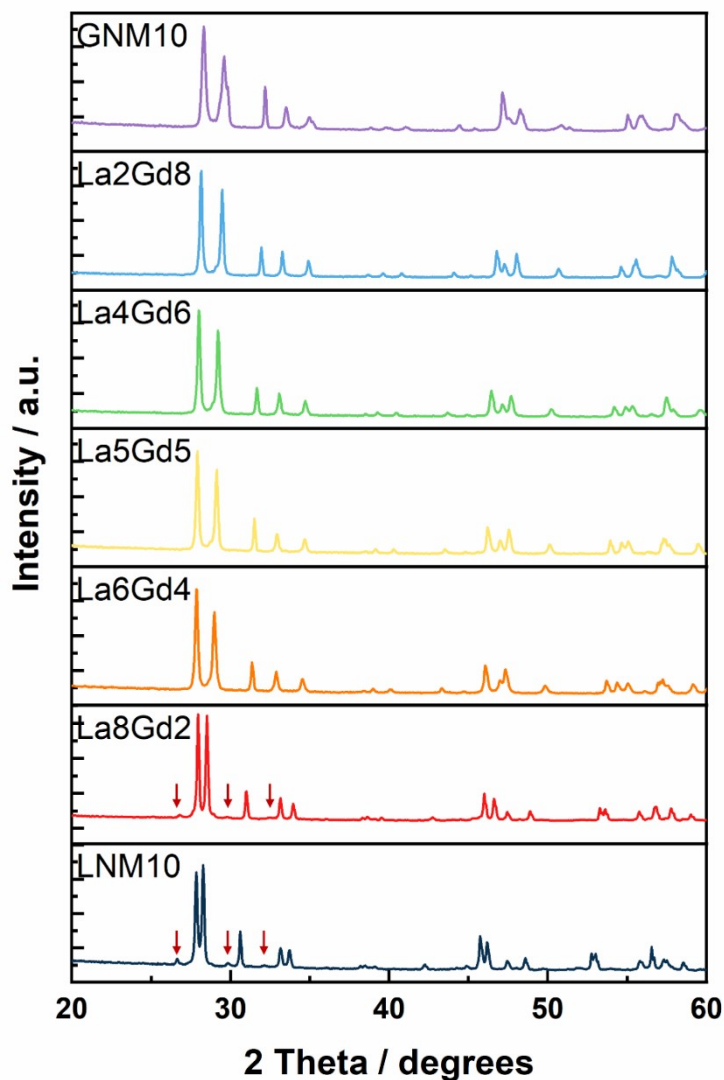

**Figure S1.** Room temperature XRD patterns of  $\text{La}_{1-x}\text{Gd}_x\text{Nb}_{0.9}\text{Mo}_{0.1}\text{O}_{4.05}$  series. The satellite reflections of modulated structure are marked by the arrows.

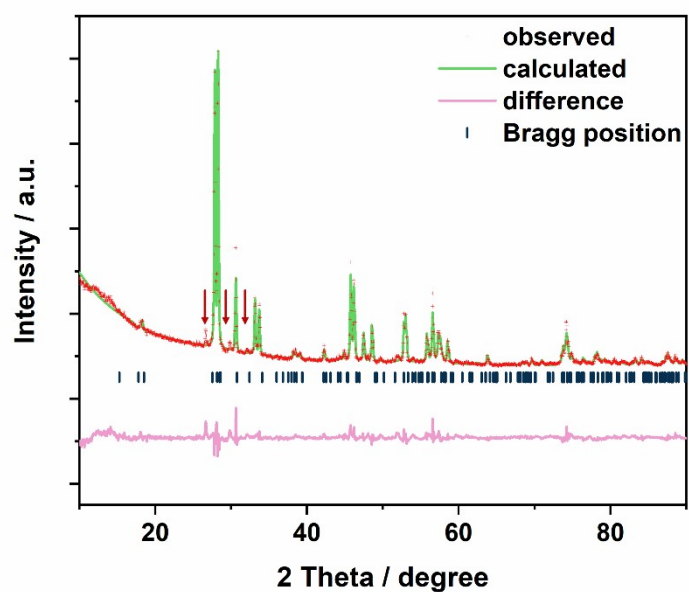

**Figure S2.** Rietveld refinement results for XRD data of LNM10 at 25 °C with  $R_{wp} = 3.89\%$ ,  $\chi^2 = 1.83$ . The satellite reflections of modulated structure are marked by the arrows.

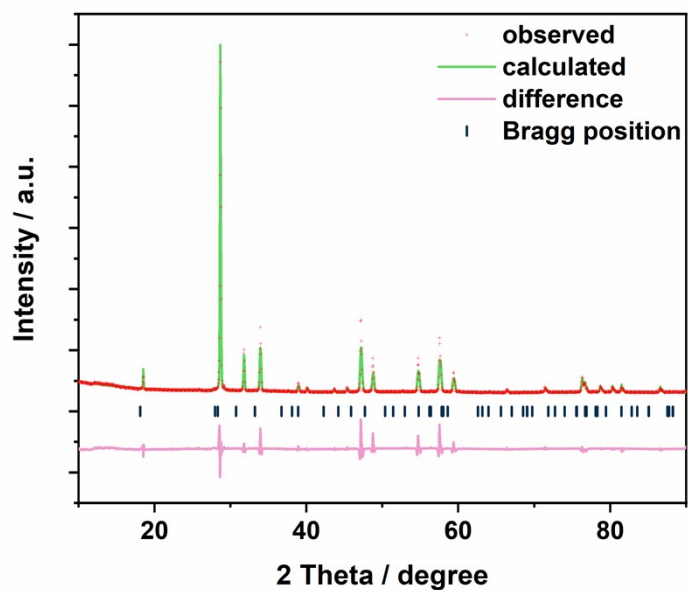

**Figure S3.** Rietveld refinement results for XRD data of GNM10 at 900 °C with  $R_{wp} = 5.59\%$ ,  $\chi^2 = 7.56$ .

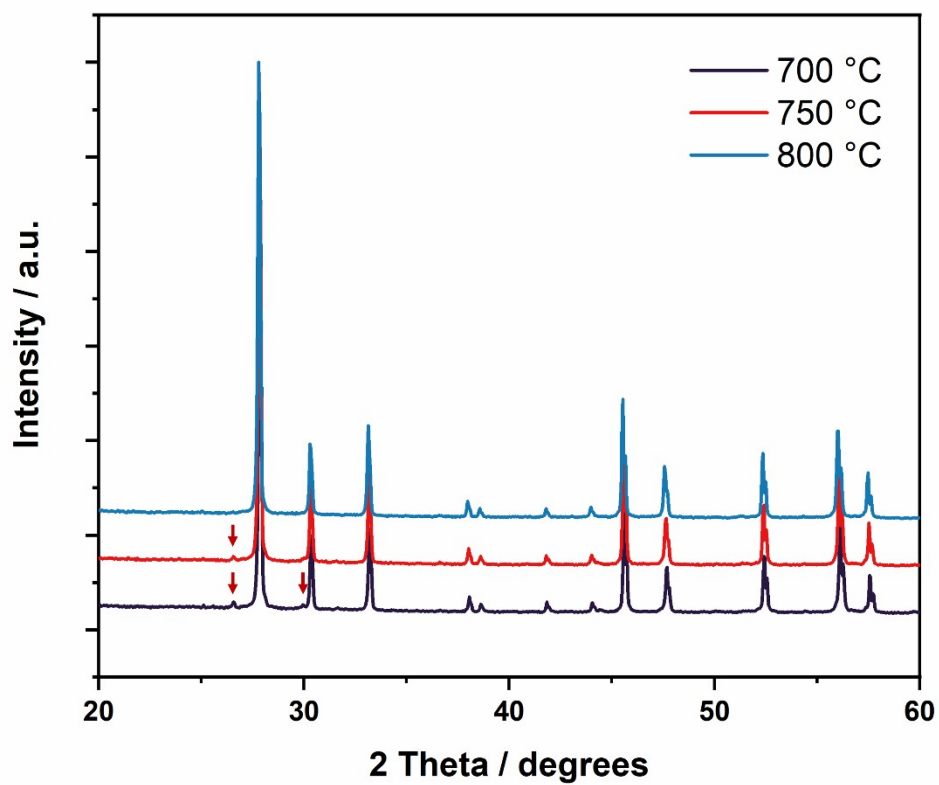

**Figure S4.** XRD patterns of LNM10 recorded at 700 °C, 750 °C and 800 °C, respectively. The satellite reflections of the modulated structure are marked by the arrows.

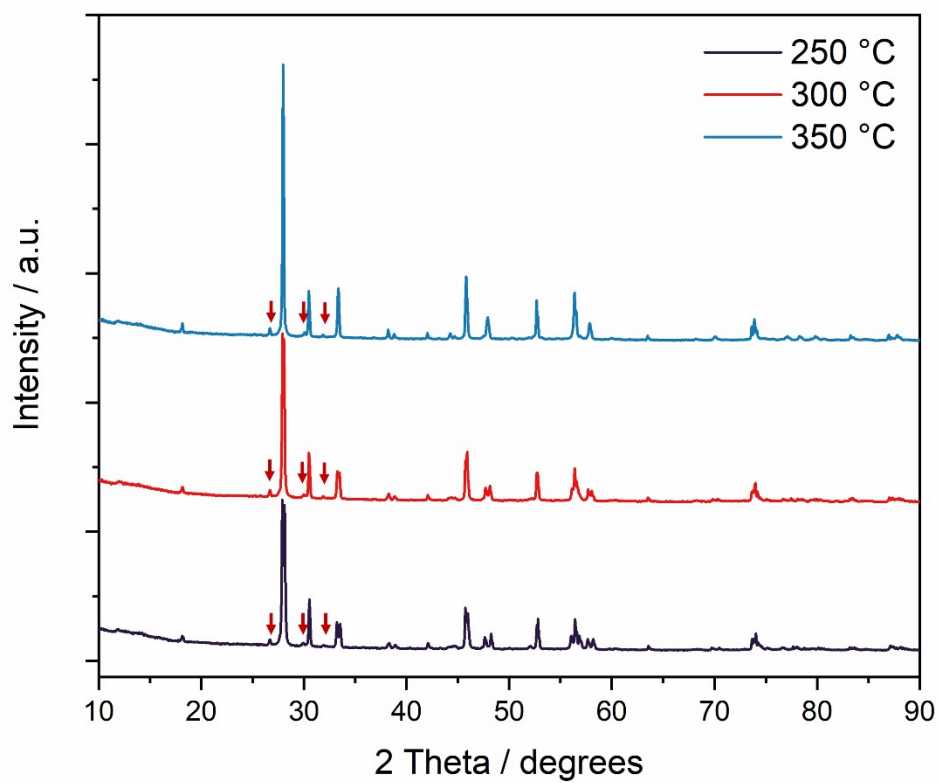

**Figure S5.** XRD patterns of LNM10 recorded at 250 °C, 300 °C and 350 °C, respectively. The satellite reflections of the modulated structure are marked by the arrows.

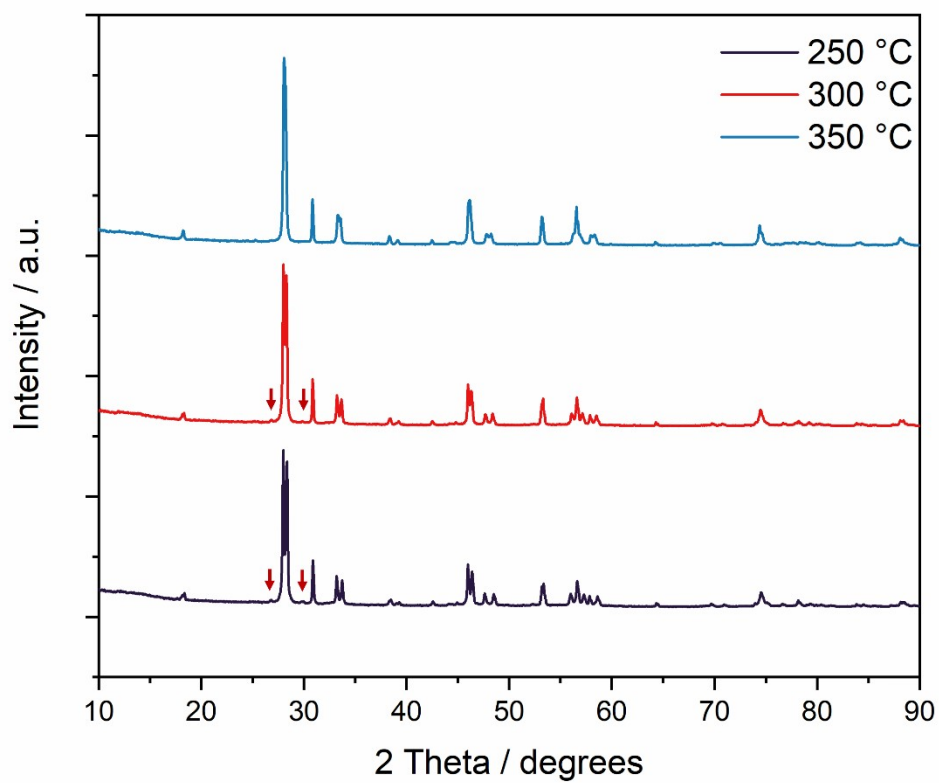

**Figure S6.** XRD patterns of La<sub>8</sub>Gd<sub>2</sub> recorded at 250 °C, 300 °C and 350 °C, respectively. The satellite reflections of the modulated structure are marked by the arrows.

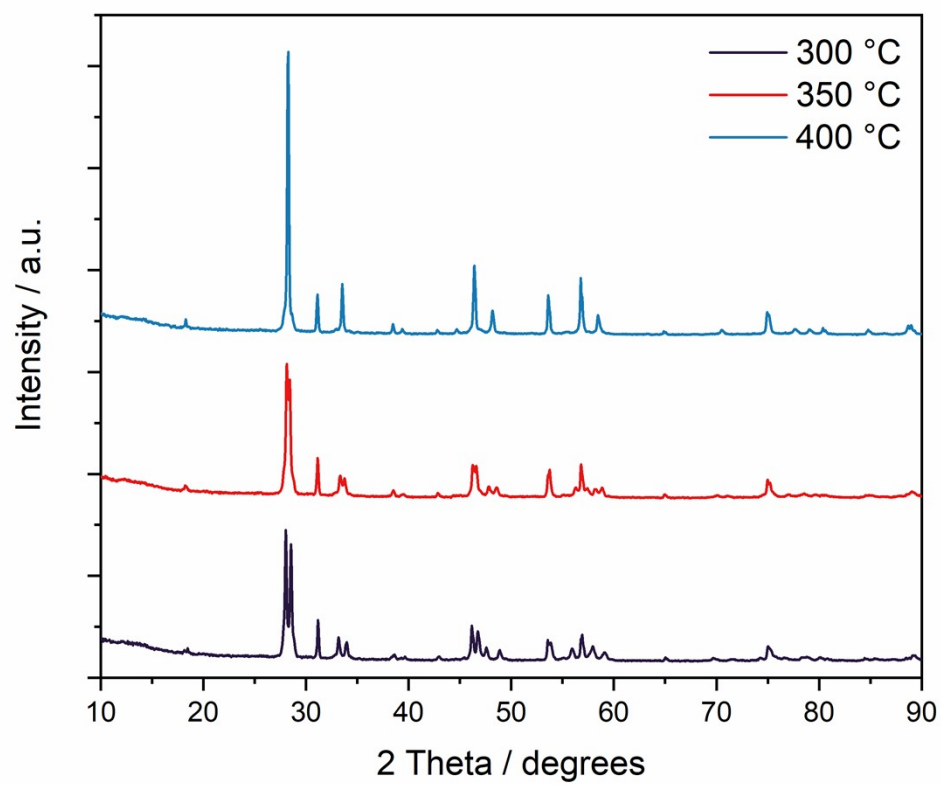

**Figure S7.** XRD patterns of La<sub>6</sub>Gd<sub>4</sub> recorded at 300 °C, 350 °C and 400 °C, respectively.

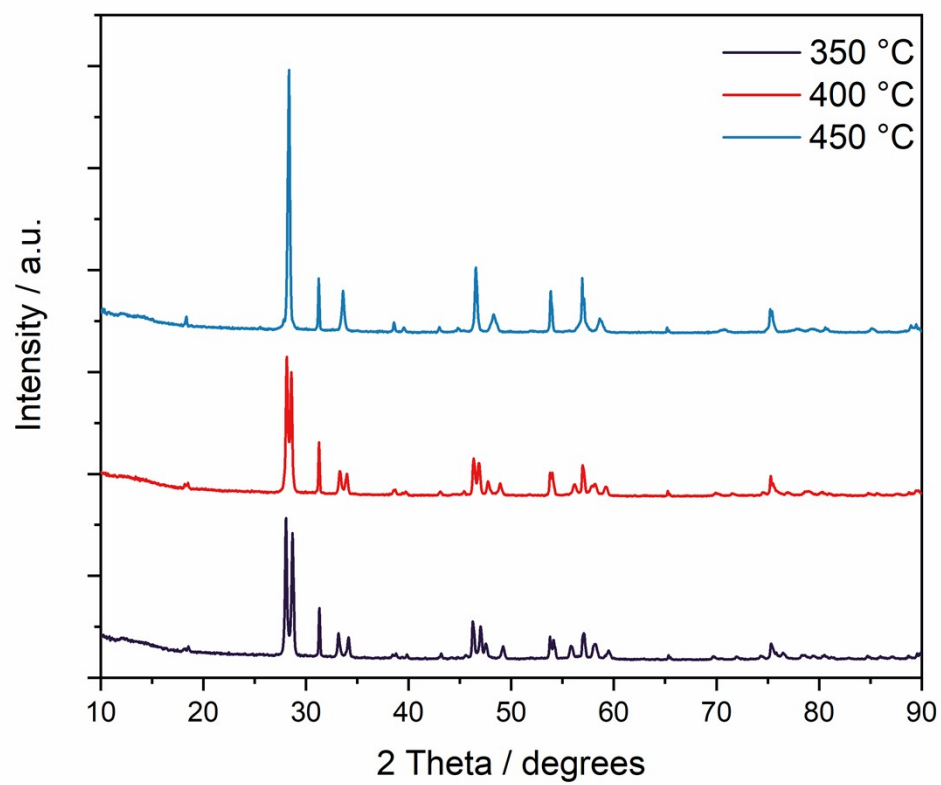

**Figure S8.** XRD patterns of La<sub>5</sub>Gd<sub>5</sub> recorded at 350 °C, 400 °C and 450 °C, respectively.

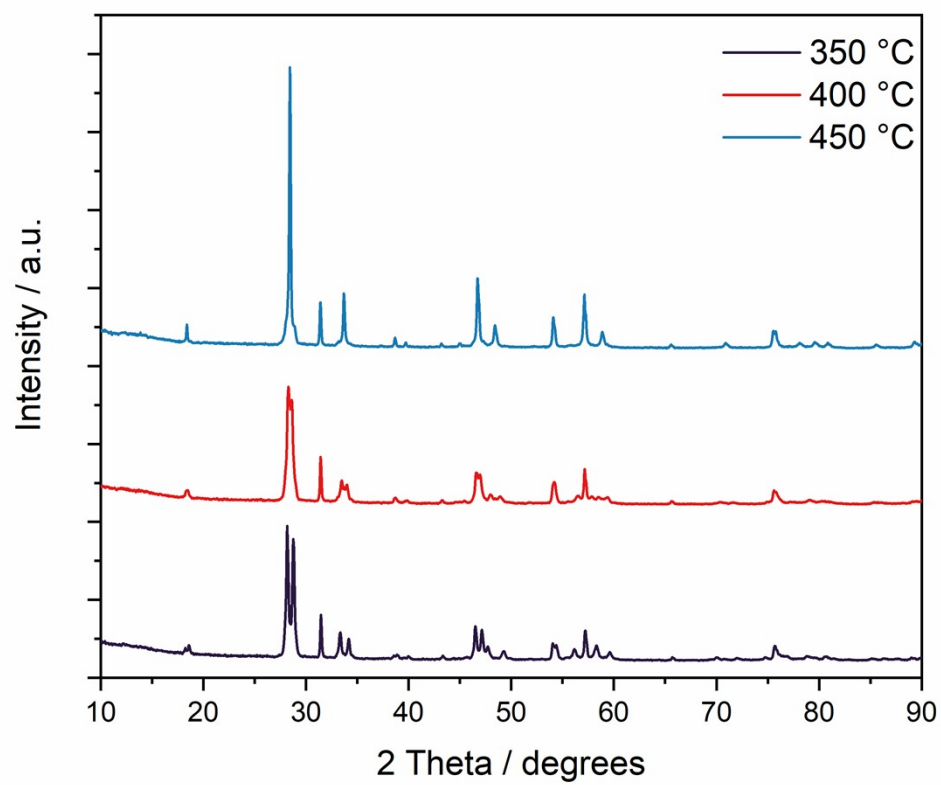

**Figure S9.** XRD patterns of  $\text{La}_4\text{Gd}_6$  recorded at 350 °C, 400 °C and 450 °C, respectively.

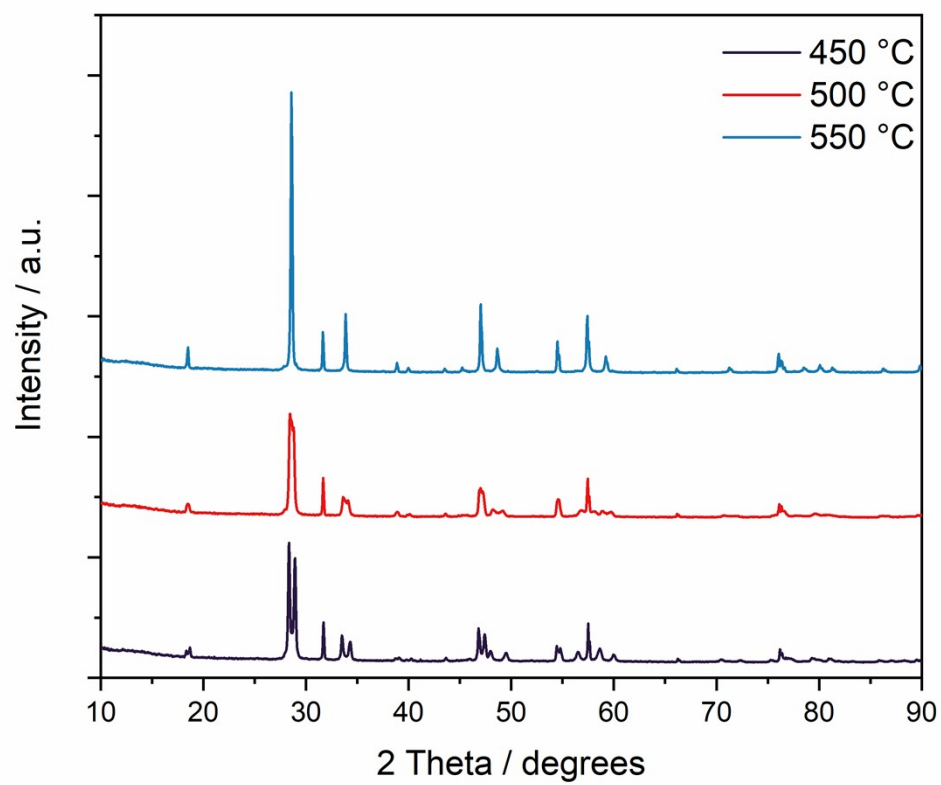

**Figure S10.** XRD patterns of  $\text{La}_2\text{Gd}_8$  recorded at 450 °C, 500 °C and 550 °C, respectively.

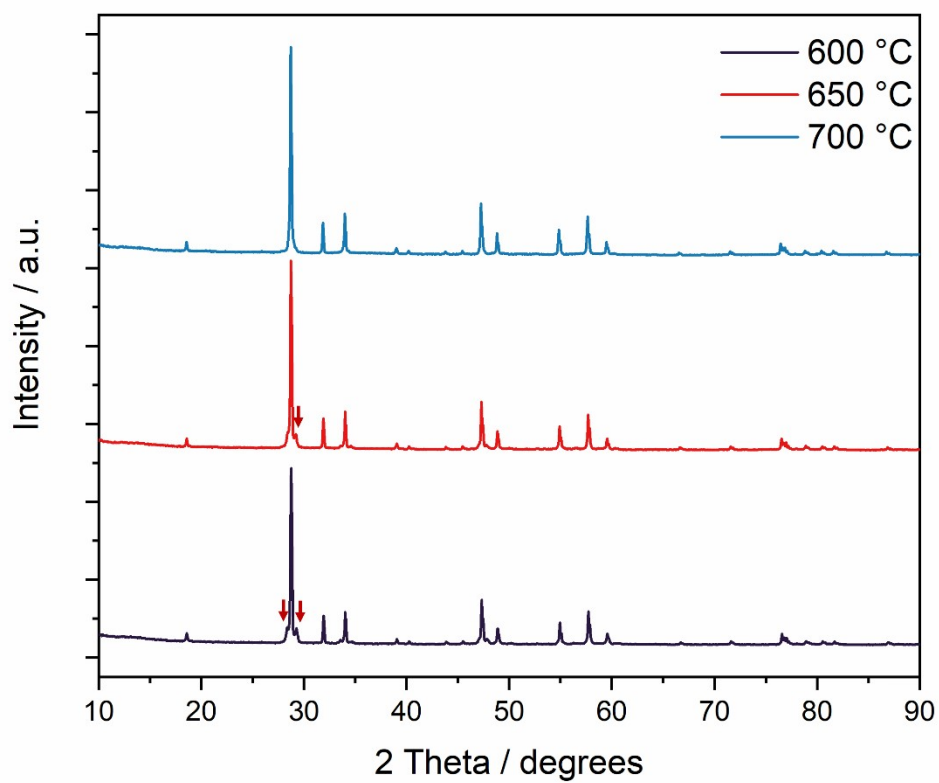

**Figure S11.** XRD patterns of GNM10 recorded at 600 °C, 650 °C and 700 °C, respectively. The peaks from monoclinic phase are marked by the arrows.

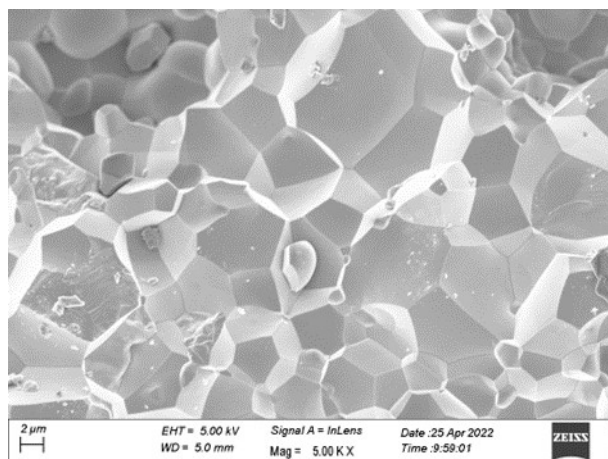

**Figure S12.** Microstructure of cross section of LNM10.

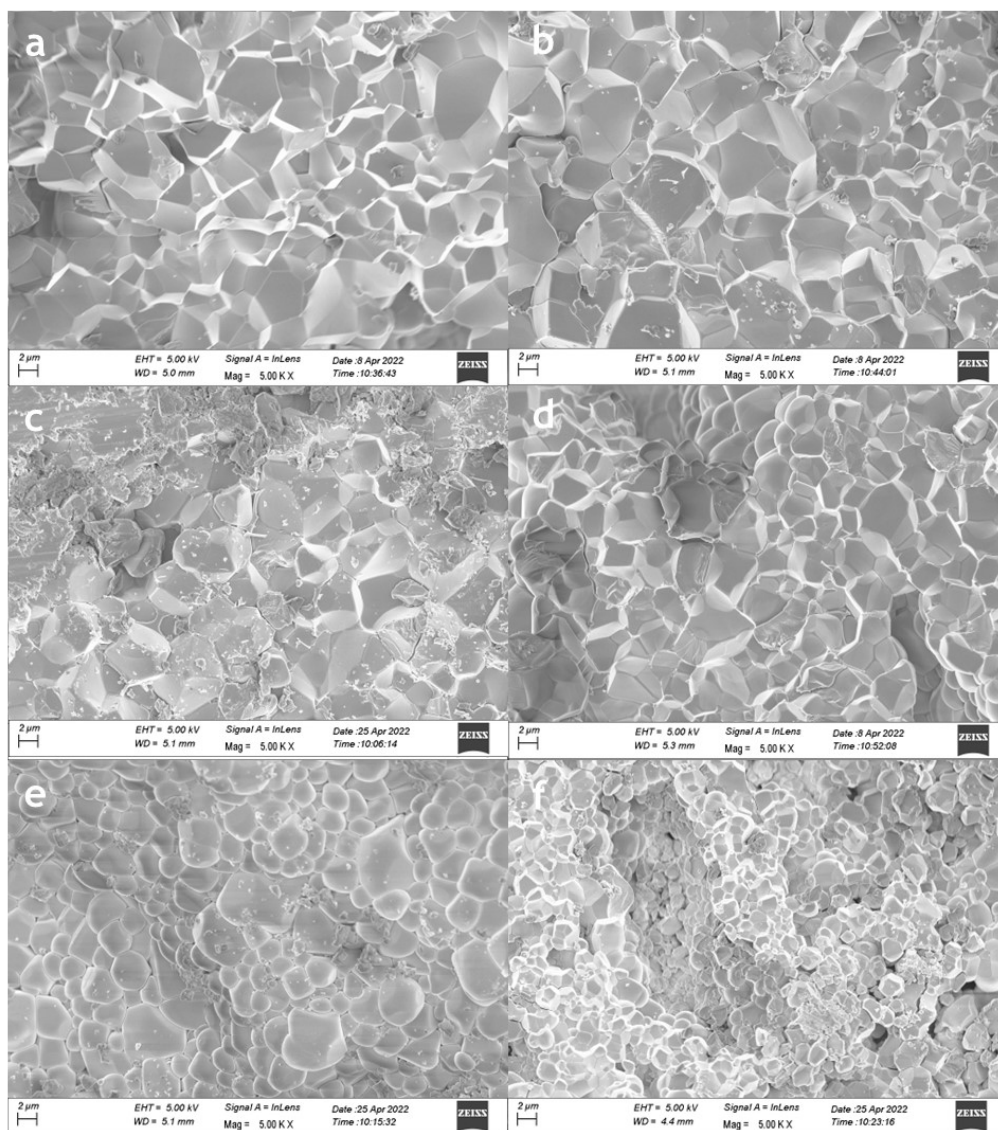

**Figure S13.** Microstructure of cross section of a) La<sub>8</sub>Gd<sub>2</sub>, b) La<sub>6</sub>Gd<sub>4</sub>, c) La<sub>5</sub>Gd<sub>5</sub>, d) La<sub>4</sub>Gd<sub>6</sub>, e) La<sub>2</sub>Gd<sub>8</sub> and f) GNM10.

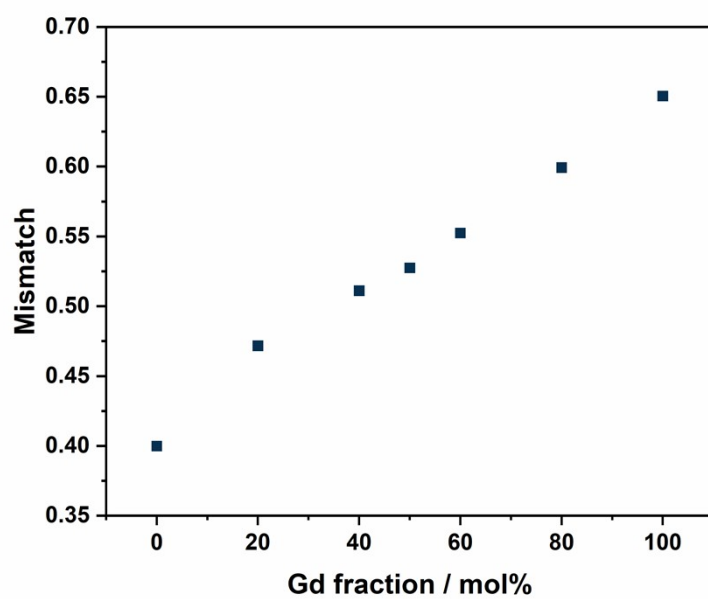

**Figure S14.** BVS results of  $\text{La}_{1-x}\text{Gd}_x\text{Nb}_{0.9}\text{Mo}_{0.1}\text{O}_{4.05}$  series on La and Gd sites.

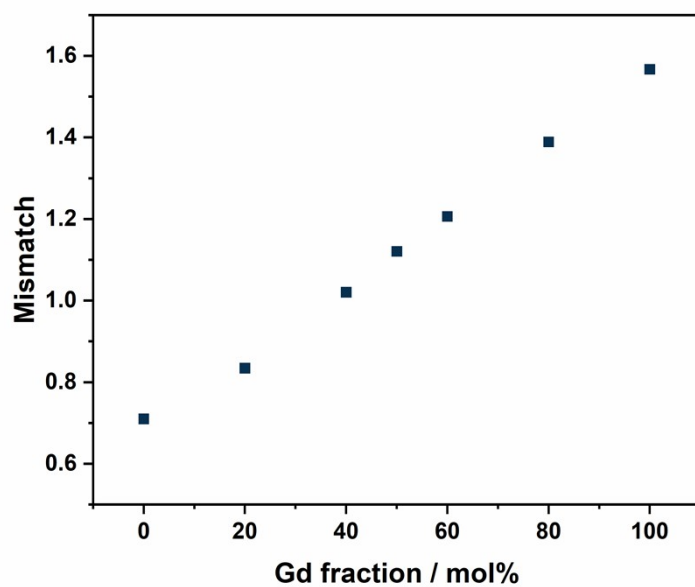

**Figure S15.** BVS results of  $\text{La}_{1-x}\text{Gd}_x\text{Nb}_{0.9}\text{Mo}_{0.1}\text{O}_{4.05}$  series on Nb site.

**Table S1.** Refined structural parameters of all samples from Rietveld refinements against XRD data collected at 25 °C.

|                     | LNm10      | La8Gd2     | La6Gd4     | La5Gd5     | La4Gd6     | La2Gd8     | GNM10      |
|---------------------|------------|------------|------------|------------|------------|------------|------------|
| Space group         | I12/a1     |
| a (Å)               | 5.3940(2)  | 5.4023(3)  | 5.4489(4)  | 5.4402(6)  | 5.4185(6)  | 5.3906(3)  | 5.3513(9)  |
| b (Å)               | 11.6543(5) | 11.5269(5) | 11.3912(7) | 11.3375(9) | 11.2881(1) | 11.1923(5) | 11.1073(5) |
| c (Å)               | 5.3067(3)  | 5.2770(3)  | 5.1957(4)  | 5.1751(6)  | 5.1721(6)  | 5.1434(2)  | 5.1322(8)  |
| $\beta$ (°)         | 91.233(2)  | 91.600(2)  | 93.178(3)  | 93.420(5)  | 93.405(4)  | 93.713(2)  | 93.563(6)  |
| V (Å <sup>3</sup> ) | 333.531(9) | 328.494(4) | 322.003(4) | 318.630(9) | 315.796(4) | 309.678(4) | 304.468(1) |
| R <sub>wp</sub> (%) | 3.89       | 4.88       | 4.20       | 6.78       | 5.50       | 3.35       | 7.50       |
| $\chi^2$            | 1.83       | 5.34       | 4.47       | 7.12       | 6.38       | 4.14       | 8.43       |

**Table S2.** Refined structural parameters of all samples from Rietveld refinements against XRD data collected at 900 °C.

|                     | LNm10              | La8Gd2             | La6Gd4             | La5Gd5             | La4Gd6             | La2Gd8             | GNM10              |
|---------------------|--------------------|--------------------|--------------------|--------------------|--------------------|--------------------|--------------------|
| Space group         | I4 <sub>1</sub> /a |
| a (Å)               | 5.4042(4)          | 5.3853(5)          | 5.3556(5)          | 5.3400(4)          | 5.3286(6)          | 5.3007(2)          | 5.2732(6)          |
| c (Å)               | 11.7868(6)         | 11.6814(7)         | 11.5615(8)         | 11.5030(6)         | 11.4497(9)         | 11.3474(2)         | 11.2439(9)         |
| V (Å <sup>3</sup> ) | 344.241(9)         | 338.785(4)         | 331.617(9)         | 328.019(8)         | 325.110(5)         | 318.842(3)         | 312.656(8)         |
| R <sub>wp</sub> (%) | 10.14              | 9.45               | 8.03               | 8.32               | 7.11               | 8.44               | 5.59               |
| χ <sup>2</sup>      | 8.16               | 7.28               | 6.25               | 6.45               | 6.21               | 7.69               | 7.56               |

**Table S3.** Refined structural parameters of all samples from Rietveld refinements against XRD data collected at 750 °C.

|                     | LNm10              | La8Gd2             | La6Gd4             | La5Gd5             | La4Gd6             | La2Gd8             | GNM10              |
|---------------------|--------------------|--------------------|--------------------|--------------------|--------------------|--------------------|--------------------|
| Space group         | I4 <sub>1</sub> /a |
| a (Å)               | 5.3910(2)          | 5.3779(2)          | 5.3495(2)          | 5.3342(3)          | 5.3222(3)          | 5.2952(3)          | 5.2696(4)          |
| c (Å)               | 11.7630(3)         | 11.6534(3)         | 11.5362(3)         | 11.4776(6)         | 11.4238(4)         | 11.3225(4)         | 11.2260(6)         |
| V (Å <sup>3</sup> ) | 341.874(9)         | 337.047(9)         | 330.134(2)         | 326.594(2)         | 323.598(7)         | 317.479(5)         | 311.742(4)         |
| R <sub>wp</sub> (%) | 4.82               | 4.63               | 3.82               | 7.98               | 3.89               | 8.44               | 5.59               |
| χ <sup>2</sup>      | 2.37               | 5.06               | 4.19               | 8.67               | 4.76               | 7.69               | 7.56               |
